# Supplementary material
Source: publisher site journal article supplement (https://www.dovepress.com/article/567827)

**Table S1 Standardized Mean Differences (SMDs) before and after propensity score matching**

|  | **Before PSM** | | |  | **After PSM** | | | **Balance Assessment** | |  |
| --- | --- | --- | --- | --- | --- | --- | --- | --- | --- | --- |
| **Characteristic** | **PELF (n=420)** | **QLESP (n=272)** | **SMD** |  | **PELF (n=256)** | **QLESP (n=256)** | **SMD** | **Before** | **After** |  |
| Age (years) | 59.8 ± 14.5 | 57.5 ± 13.2 | 0.164 |  | 56.9 ± 14.0 | 57.9 ± 13.1 | 0.072 | Imbalanced | Balanced |  |
| Male/female | 173/247 | 128/144 | 0.119 |  | 122/134 | 118/138 | 0.032 | Imbalanced | Balanced |  |
| Height (cm) | 163.9± 20.7 | 165.1 ± 8.9 | 0.074 |  | 164.7 ± 8.8 | 164.9 ± 8.9 | 0.022 | Balanced | Balanced |  |
| Weight (kg) | 61.1 ± 13.7 | 64.8 ± 12.2 | 0.282 |  | 66.0 ± 12.4 | 64.0 ± 11.7 | 0.165 | Imbalanced | Balanced |  |
| Diagnosis, n (%) |  |  | 0.159 |  |  |  | 0.135 | Imbalanced | Balanced |  |
| Osteoarthritis | 60 (14.3) | 20 (7.4) |  |  | 36 (14.1) | 20 (7.8) |  |  |  |  |
| Osteonecrosis | 226 (53.8) | 154 (56.6) |  |  | 146 (57.0) | 148 (57.8) |  |  |  |  |
| Congenital hip dysplasia | 134 (31.9) | 98 (36.0) |  |  | 74 (28.9) | 88 (34.4) |  |  |  |  |
| ASA class, n (%) |  |  | 0.289 |  |  |  | 0.101 | Imbalanced | Balanced |  |
| I | 10 (2.4) | 9 (3.3) |  |  | 7 (2.7) | 8 (3.1) |  |  |  |  |
| II | 269 (64.0) | 204 (75.0) |  |  | 178 (69.5) | 189 (73.8) |  |  |  |  |
| III | 141 (33.6) | 59 (21.7) |  |  | 71 (27.7) | 59 (23.0) |  |  |  |  |
| Duration of surgery (min) | 141.8 ± 74.6 | 133.0 ± 66.7 | 0.126 |  | 128.3 ± 62.9 | 134.4 ± 67.8 | 0.094 | Imbalanced | Balanced |  |
| Intraoperative sufentanil consumption (μg) | 27.2 ± 4.4 | 26.6 ± 4.6 | 0.134 |  | 26.9 ± 4.6 | 26.5 ± 4.1 | 0.090 | Imbalanced | Balanced |  |
| Waiting time to operation (day) | 5.9 ± 5.9 | 6.6 ± 6.0 | 0.117 |  | 5.7 ± 5.8 | 5.8 ± 5.6 | 0.017 | Imbalanced | Balanced |  |

**Notes:** Values are presented as the mean ± standard deviation or number.

**Abbreviations:** ASA, American Society of Anesthesiologists; SMD, standardized mean differences; PSM, propensity score matching; PELF, pericapsular nerve group combined with lateral femoral cutaneous nerve block,; QLESP, transmuscular quadratus lumborum and modified erector spinae plane block.

**Figure S1** Love plot visualizing the SMDs for each covariate before and after matching.

Abbreviations: SMDs, standardized mean differences.


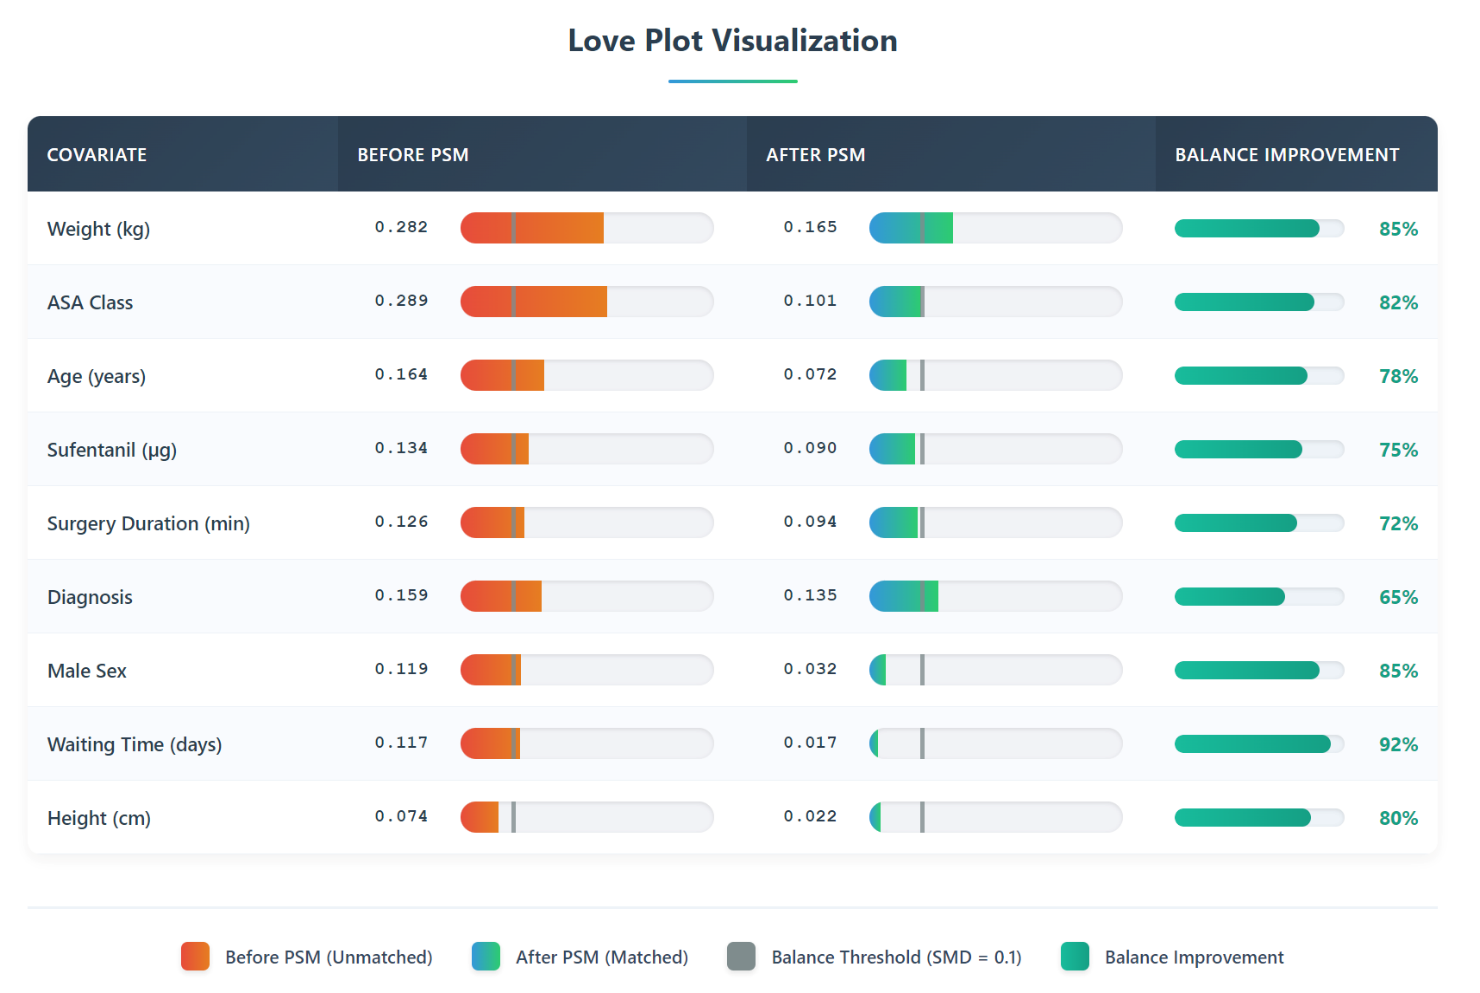

Supplement: Supplementary file 1 [file 567827%20Revised%20supplementary%20materials.docx]
